# Supplementary material
Source: PubMed Central journal article supplement (PMC10529885)
Supplement: NIHMS1911438-supplement-1.pdf [file NIHMS1911438-supplement-1.pdf]

**PD-L1/PD-1 checkpoint pathway regulates hippocampal neuronal excitability  
and learning and memory behavior**

Junli Zhao, Sangsu Bang, Kenta Furutani, Aidan McGinnis, Changyu Jiang, Alexis Roberts, Christopher R Donnelly, Qianru He, Michael L. James, Miles Berger, Mei-Chuan Ko, Haichen Wang, Richard D. Palmiter, and Ru-Rong Ji

**Supplemental Information**

Supplementary Figures: 1-12

Supplementary Tables: S1-S5, also see Excel files for Tables S1 and S5

## Supplementary Figures and Figure Legends

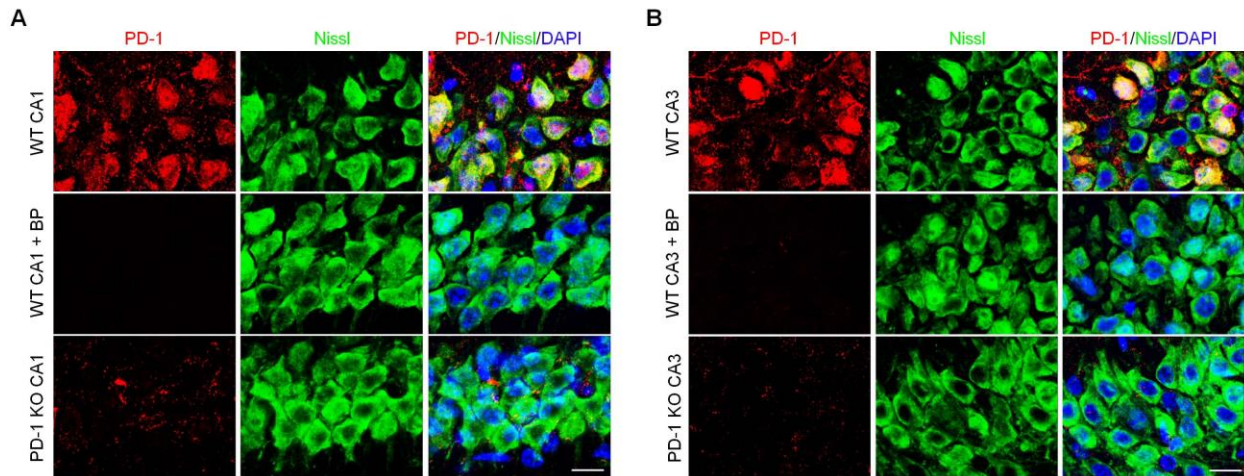

**Figure S1. Characterization of PD-1 expression in mouse hippocampal neurons. Related to Figure 1.**

(A) Representative images showing double immunostaining of PD-1 and Nissl in WT CA1 neurons (top) and loss of PD-1 staining after incubation with PD-1 blocking peptide in WT neurons (middle) and loss of PD-1 staining in PD-1 KO neurons (bottom). Scale bar, 20  $\mu\text{m}$ .

(B) Representative images showing double immunostaining of PD-1 and Nissl in WT CA3 neurons (top) and loss of PD-1 staining after incubation with PD-1 blocking peptide in WT neurons (middle) and loss of PD-1 staining in PD-1 KO neurons (bottom). Scale bar, 20  $\mu\text{m}$ .

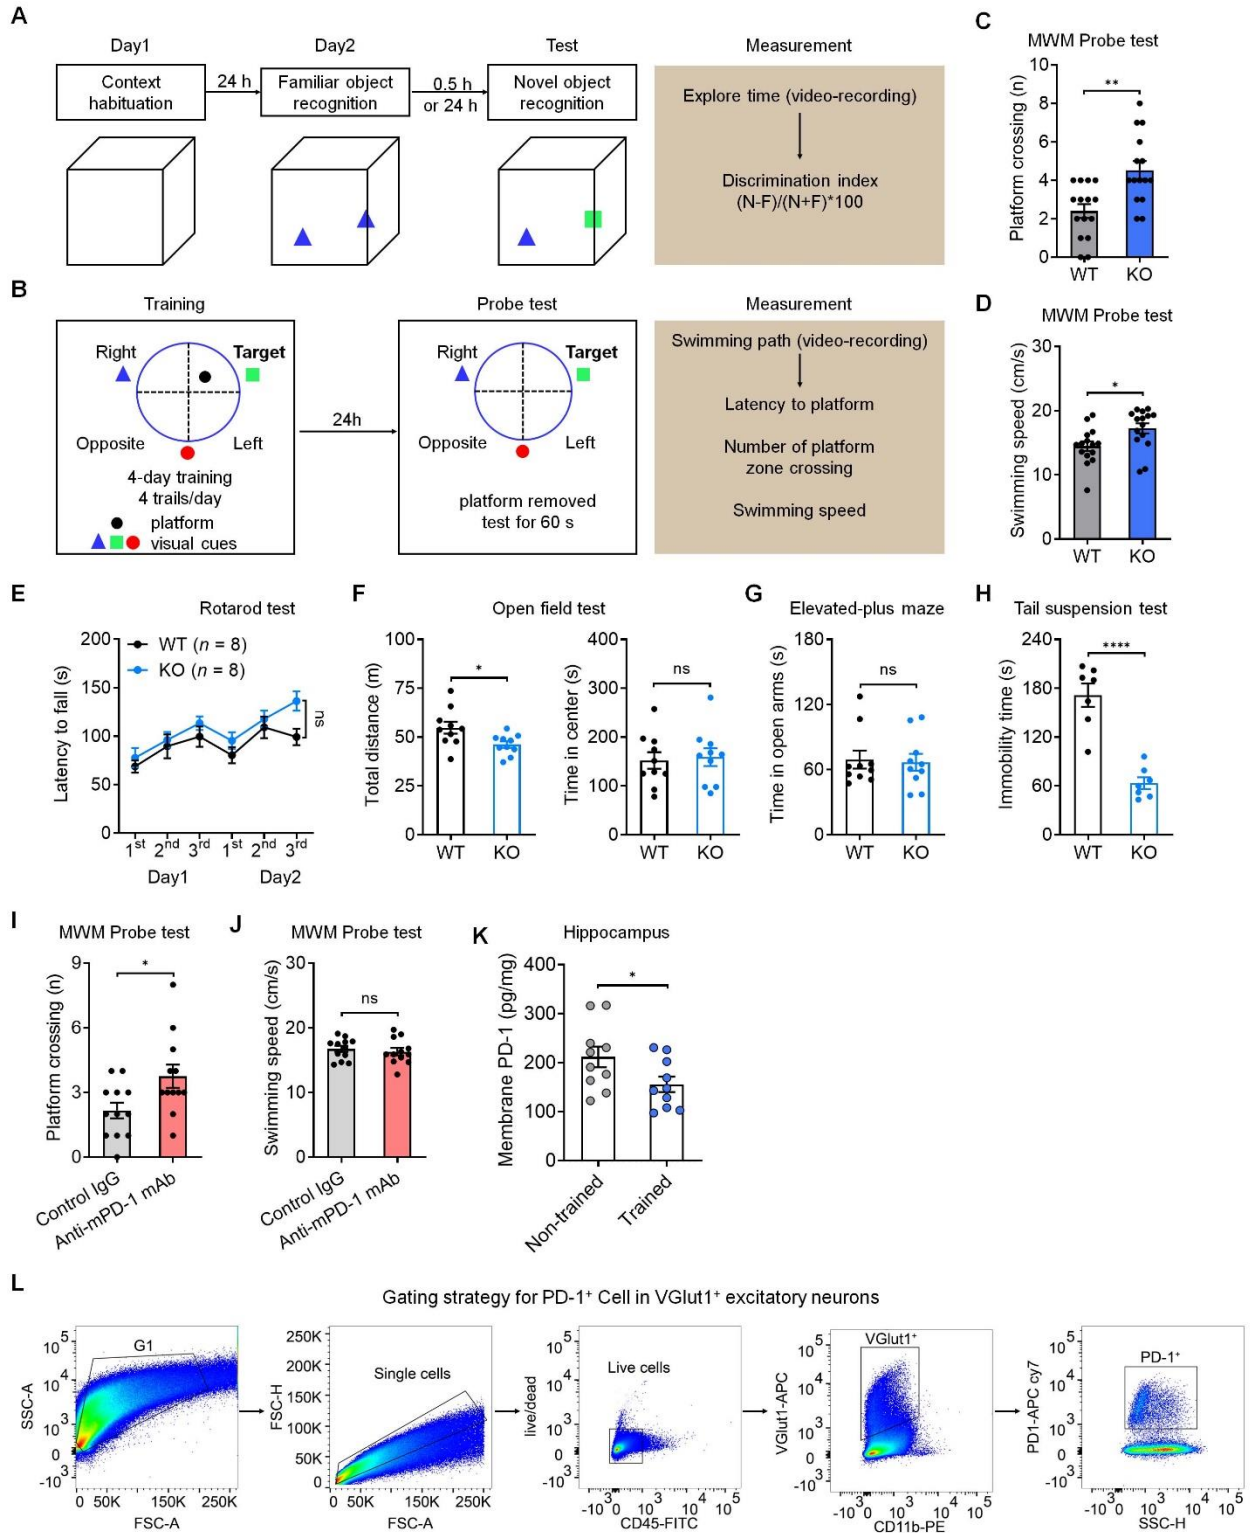

**Figure S2. Characterization of learning and memory behaviors and PD-1 expression. Related to Figure 1.**

- (A) Schematic of NOR testing.
- (B) Schematic of MWM training and probe test.
- (C) MWM probe test for number of platform crossings in WT mice ( $n = 15$ ) and PD-1 KO mice ( $n = 15$ ).
- (D) Swimming speed of WT mice ( $n = 15$ ) and PD-1 KO mice ( $n = 15$ ) in MWM probe tests.
- (E) Motor coordination of WT mice ( $n = 8$ ) and PD-1 KO mice ( $n = 8$ ) in rotarod test, measured as latency to fall.
- (F) Locomotor activity and anxiety-like behavior tests of WT mice ( $n = 10$ ) and PD-1 KO mice ( $n = 10$ ) in open field test.
- (G) Anxiety-like behavior of WT mice ( $n = 10$ ) and PD-1 KO mice ( $n = 10$ ) measured by elevated-plus maze.
- (H) Depressive-like behavior of WT mice ( $n = 10$ ) and PD-1 KO mice ( $n = 10$ ) measured by tail-suspension.
- (I) MWM probe test for number of platform crossings in WT mice treated with control IgG ( $n = 12$ ) and anti-mPD-1 mAb ( $n = 12$ ).
- (J) Swimming speed of WT mice treated with control IgG ( $n = 12$ ) and anti-mPD-1 mAb ( $n = 12$ ) in MWM probe tests.
- (K) Cell-surface biotinylation and ELISA analysis showing membrane PD-1 levels in non-trained ( $n = 10$ ) and trained ( $n = 10$ ) mice.
- (L) Flow cytometry gating strategy for PD-1<sup>+</sup> cells in hippocampal Vglut1<sup>+</sup> excitatory neurons.

Data are represented as mean  $\pm$  SEM. \* $P < 0.05$ , \*\* $P < 0.01$ , \*\*\*\* $P < 0.0001$ , ns: no significant. Two-tailed Student's t test (D, F, G, H, J, K), Two-way ANOVA (E), Mann-Whitney test (C, I).

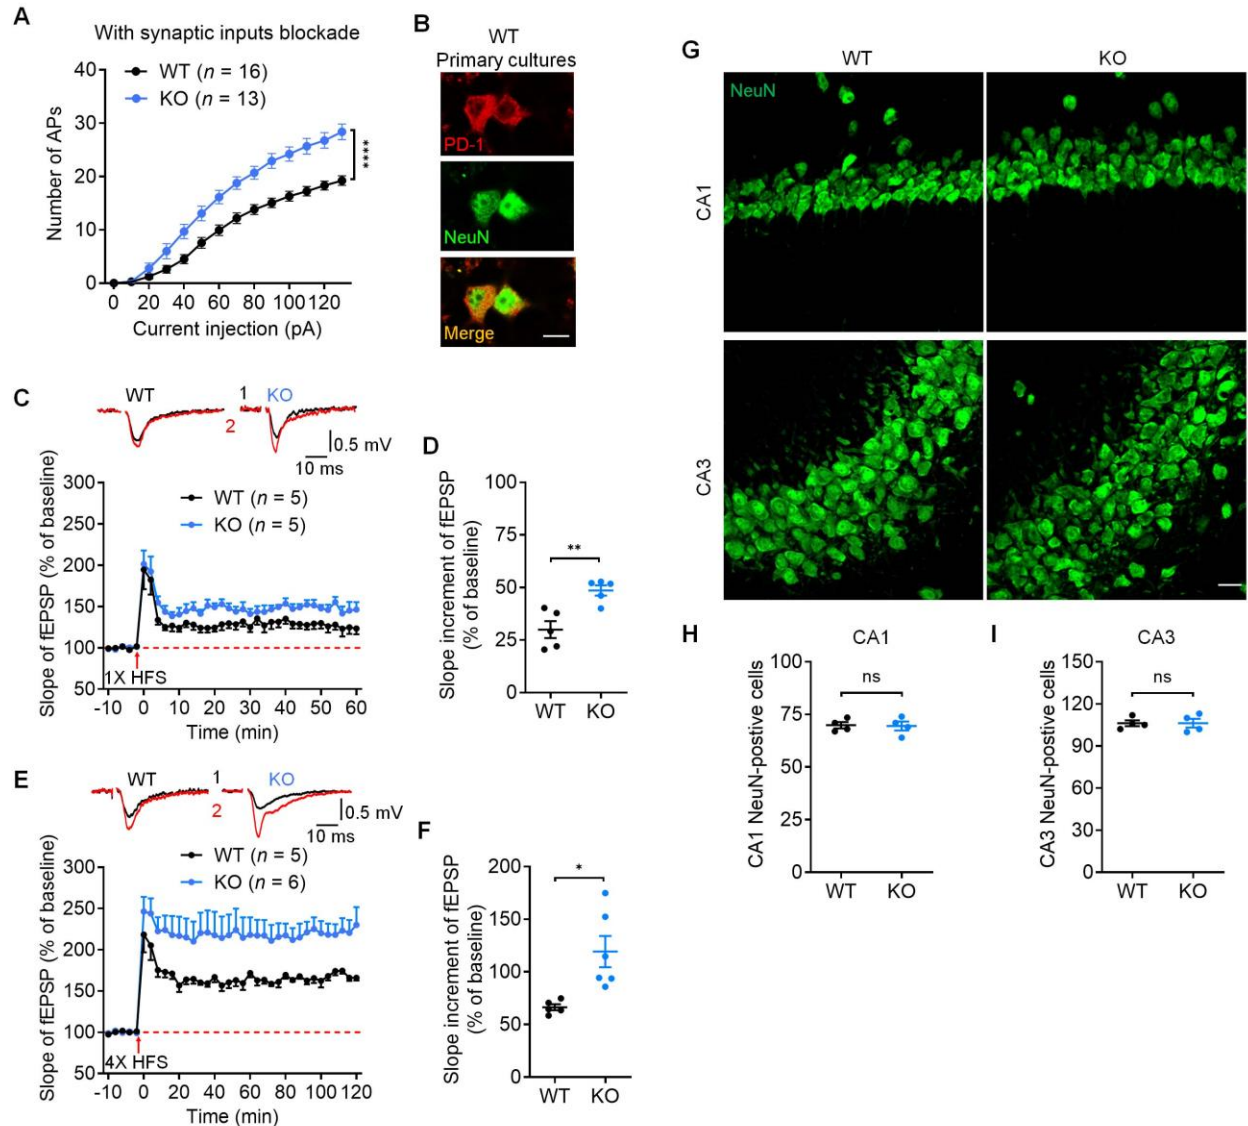

**Figure S3. Characterization of electrophysiological parameters and neuronal numbers in mouse hippocampal neurons with PD-1 loss. Related to Figure 2 and Figure 3.**

(A) Number of APs evoked by step current injection in WT and PD-1 KO CA1 neurons with synaptic input blockade. WT:  $n = 16$  neurons from 4 mice; PD-1 KO:  $n = 13$  neurons from 3 mice.

(B) Representative images of PD-1 immunocytochemistry in WT primary hippocampal neurons. Scale bar, 10  $\mu\text{m}$ .

(C-F) LTP in the CA1 region of brain slices induced 1  $\times$  HFS and 4  $\times$  HFS.

(C-D) Summary plots (C) and average slope (D) of LTP induced by 1  $\times$  HFS in WT slices ( $n = 5$  from 5 mice) and PD-1 KO slices ( $n = 5$  from 5 mice). Top: Black traces (1) and red trace (2) represent the baseline fEPSP and post-induction fEPSP, respectively.

**(E-F)** Summary plots (E) and average slope (F) of LTP induced by  $4 \times$  HFS in the CA1 region of WT slices ( $n = 5$  from 5 mice) and PD-1 KO slices ( $n = 6$  from 5 mice). Top: Black traces (1) and red trace (2) represent the baseline fEPSP and post-induction fEPSP, respectively.

**(G-I)** Representative confocal microscopy images in CA1 and CA3 (G). Quantification of NeuN<sup>+</sup> neurons in CA1 (H) and CA3 (I) of WT mice and PD-1 KO mice ( $n = 4$ ). Scale bar, 50  $\mu\text{m}$ .

Data are represented as mean  $\pm$  SEM. \* $P < 0.05$ , \*\* $P < 0.01$ , \*\*\*\* $P < 0.0001$ , ns: no significant. Two-tailed Student's t-test (D, F, H, I), Two-way ANOVA (A).



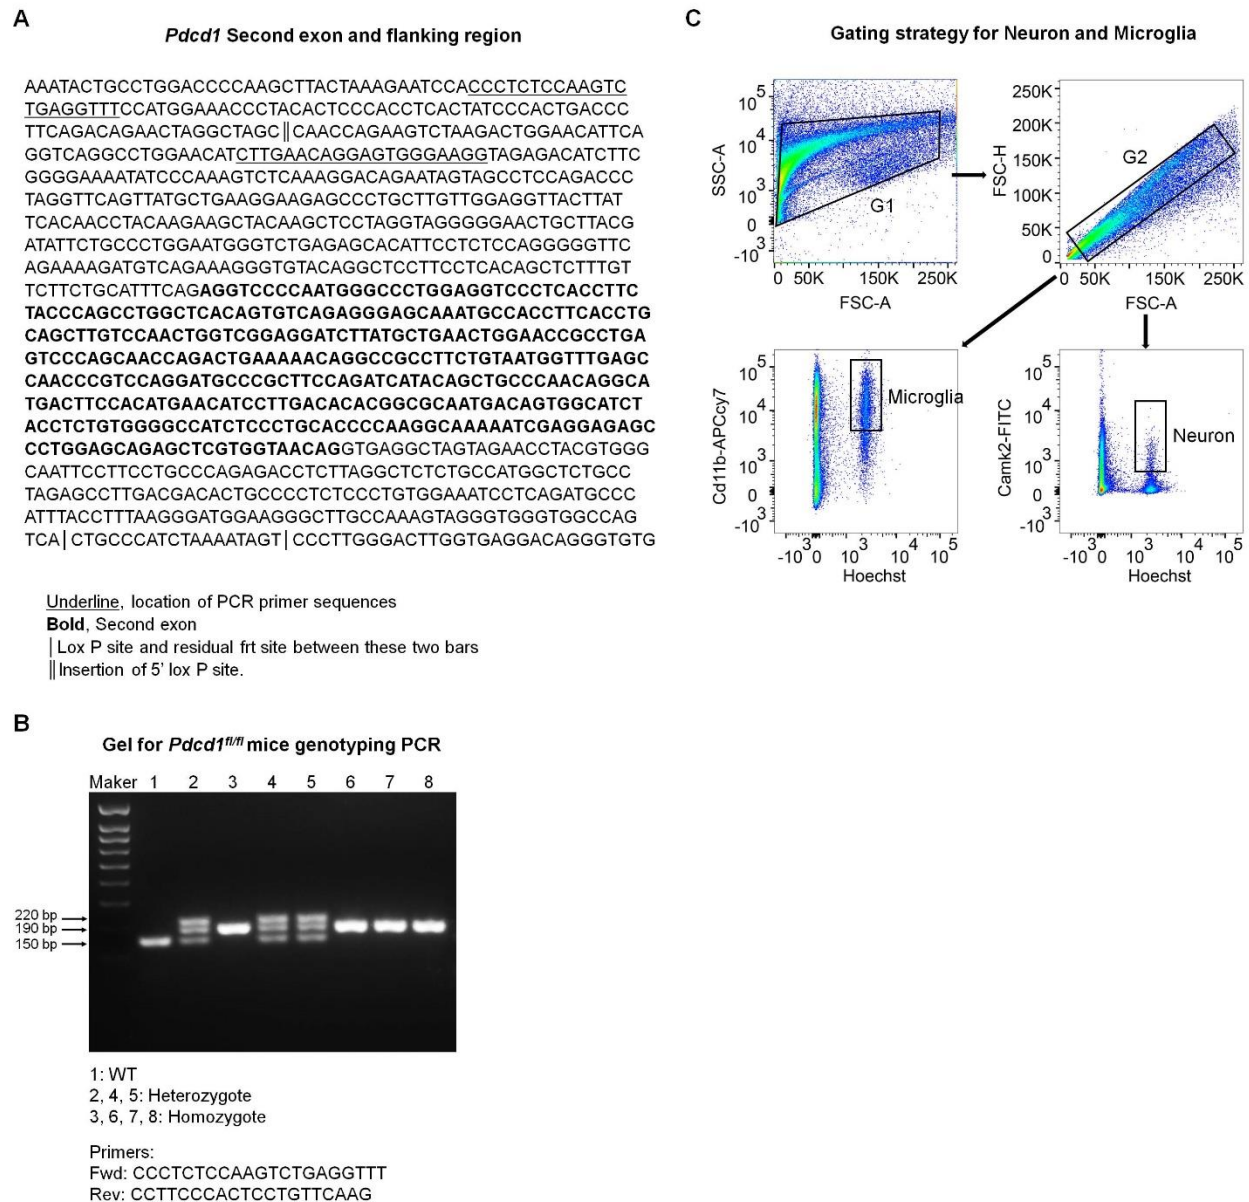

**Figure S4. Schematic of generating *Pdcd1<sup>fl/fl</sup>* mice and validation of transgenic mice.**

**Related to Figure 4.**

(A) *Pdcd1* sequence including second exon (bold), Lox P site and residual frt site, and insertion of 5' lox P site. The sequences for the design of PCR primers are underlined.

(B) Validation of *Pdcd1<sup>fl/fl</sup>* mice via genotyping. Bottom, PCR primer sequences.

(C) Flow cytometry gating strategy for examining PD-1 expression in neurons and microglia.

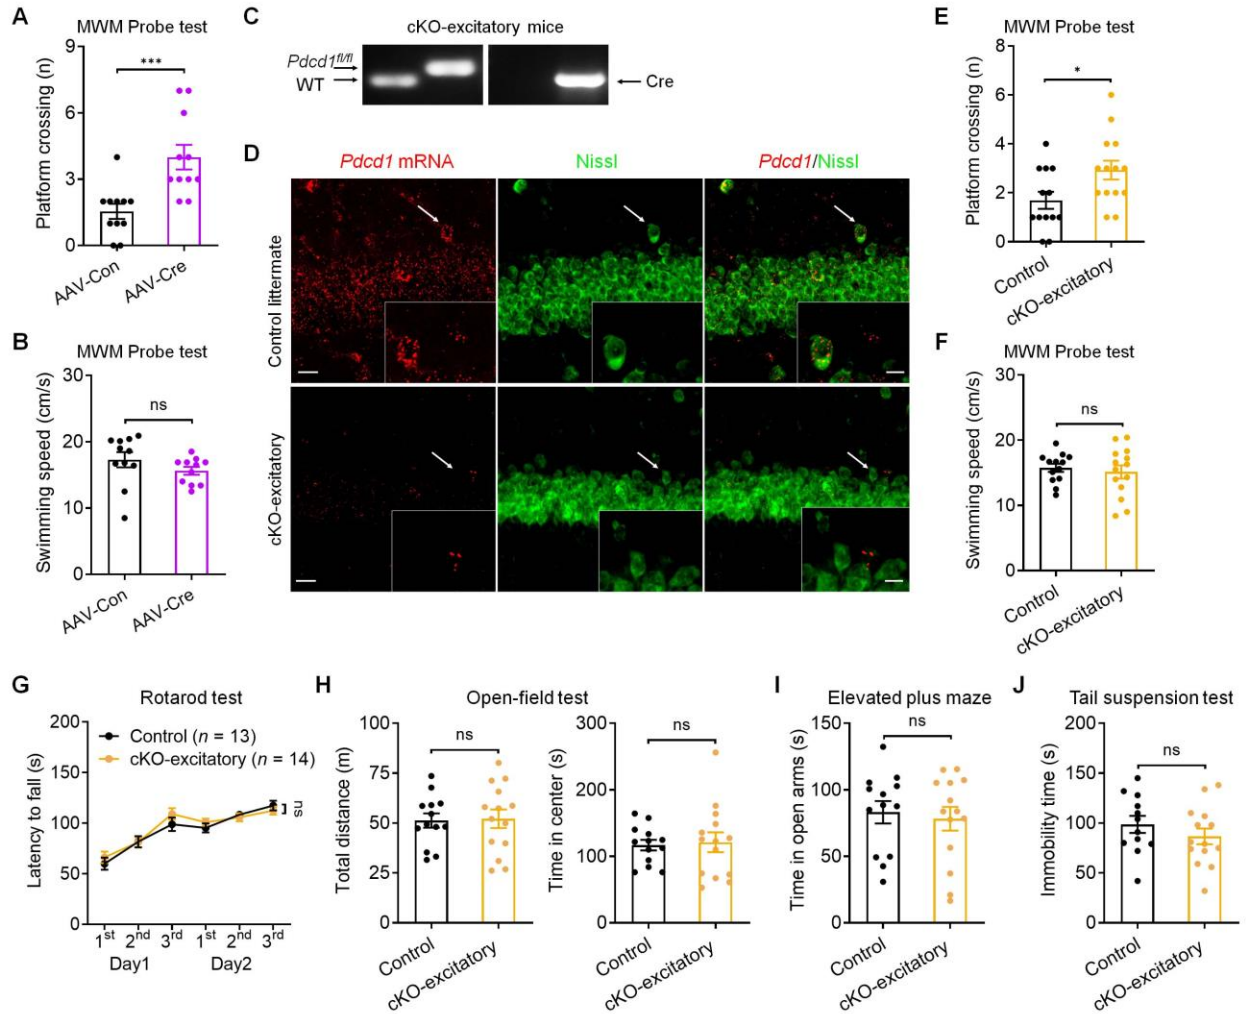

**Figure S5. Conditional knockout of *Pdccl1* in excitatory neurons enhances learning and memory without altering emotional status. Related to Figure 4.**

(A-B) MWM probe tests in *Pdccl1<sup>fl/fl</sup>* mice injected with AAV-control ( $n = 11$ ) and AAV-*Camk2a*:Cre ( $n = 11$ ) showing latency to platform (A) and swimming speed (B).

(C) Genotyping characterization of cKO-excitatory mice.

(D) Representative images show *Pdccl1* expression in CA1 neurons of control littermates, which is markedly reduced in cKO-excitatory mice. Scale bar, 20  $\mu$ m. Inserted boxes are higher magnification images showing co-localization of *Pdccl1* with Nissl in CA1 neurons. Scale bar, 10  $\mu$ m.

(E-F) MWM probe tests in control littermates ( $n = 13$ ) and cKO-excitatory mice ( $n = 14$ ) showing latency to platform (E) and swimming speed (F).



**(G)** Motor coordination of control littermates ( $n = 13$ ) and cKO-excitatory mice ( $n = 14$ ) in rotarod test.

**(H)** Locomotor activity and anxiety-like behavior of control littermates ( $n = 13$ ) and cKO-excitatory mice ( $n = 14$ ) in open-field test.

**(I)** Anxiety-like behavior of control littermates ( $n = 13$ ) and cKO-excitatory mice ( $n = 14$ ) in elevated-plus maze test.

**(J)** Depressive-like behavior of control littermates ( $n = 12$ ) and cKO-excitatory mice ( $n = 14$ ) in tail-suspension test.

Data are represented as mean  $\pm$  SEM. \* $P < 0.05$ , \*\*\* $P < 0.001$ , ns: no significant. Mann-Whitney test (A, E), Two-tailed unpaired Student's t-test (B, F, H, I, J), Two-way ANOVA (G).

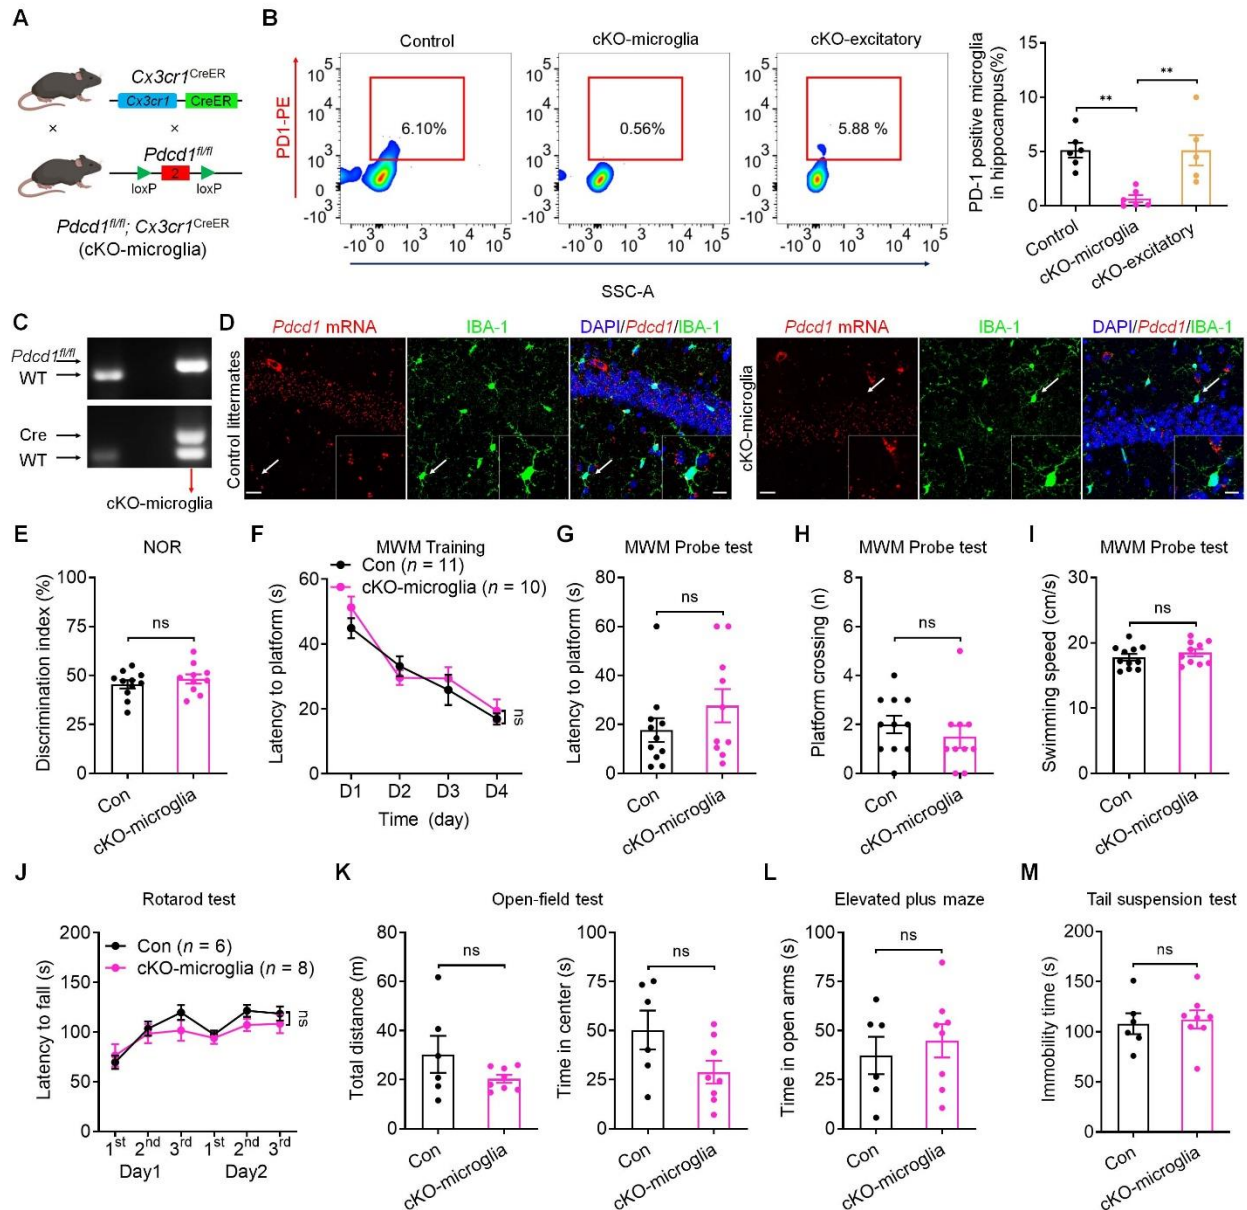

**Figure S6. Conditional knockout of *Pcd1* in microglia does not affect learning and memory. Related to Figure 4.**

(A) Schematic illustration of the strategy to delete *Pcd1* in microglia in conditional knockout mice (cKO-microglia).

(B) Flow cytometry images show the percentage of PD-1<sup>+</sup> microglia in the hippocampi of control littermates ( $n = 6$ ), cKO-microglia mice ( $n = 6$ ), and cKO-excitatory mice ( $n = 5$ ). Note that PD-1 is lost in *Cx3cr1*<sup>+</sup> microglia in cKO-microglia mice but not in control littermates or cKO-excitatory mice.

(C) Genotyping characterization of cKO-microglia mice.

**(D)** Representative images show *Pdcd1* expression in CA1 microglia of control littermates, which is substantially reduced in cKO-microglia mice. Scale bar, 20  $\mu$ m. Inserted boxes are higher magnification images showing co-localization of *Pdcd1* with IBA-1 in CA1 neurons. Scale bar, 10  $\mu$ m.

**(E)** Discrimination index of control littermates ( $n = 11$ ) and cKO-microglia mice ( $n = 10$ ) in NOR testing.

**(F)** Spatial learning curves during MWM training show learning capacity in control littermates ( $n = 11$ ) and cKO-microglia mice ( $n = 10$ ).

**(G-I)** MWM probe tests for latency to platform (G), platform zone crossings number (H), and swimming speed (I) in control littermates ( $n = 11$ ) and cKO-microglia mice ( $n = 10$ ).

**(J)** Motor coordination of control littermates ( $n = 6$ ) and cKO-microglia mice ( $n = 8$ ) in rotarod test.

**(K)** Locomotor activity (left) and anxiety-like behavior (right) in control littermates ( $n = 6$ ) and cKO-microglia mice ( $n = 8$ ) in open-field test.

**(L)** Anxiety-like behavior in control littermates ( $n = 6$ ) and cKO-microglia mice ( $n = 8$ ) measured in elevated-plus maze test.

**(M)** Depression-like behavior in control littermates ( $n = 6$ ) and cKO-microglia mice ( $n = 8$ ) measured in tail-suspension test.

Data are represented as mean  $\pm$  SEM. \*\* $P < 0.01$ , ns: no significant. One-way ANOVA with Tukey's post-hoc test (B), Two-tailed unpaired Student's t-test (E, I, K, L, M), Two-way ANOVA (F), Mann-Whitney test (G, H).

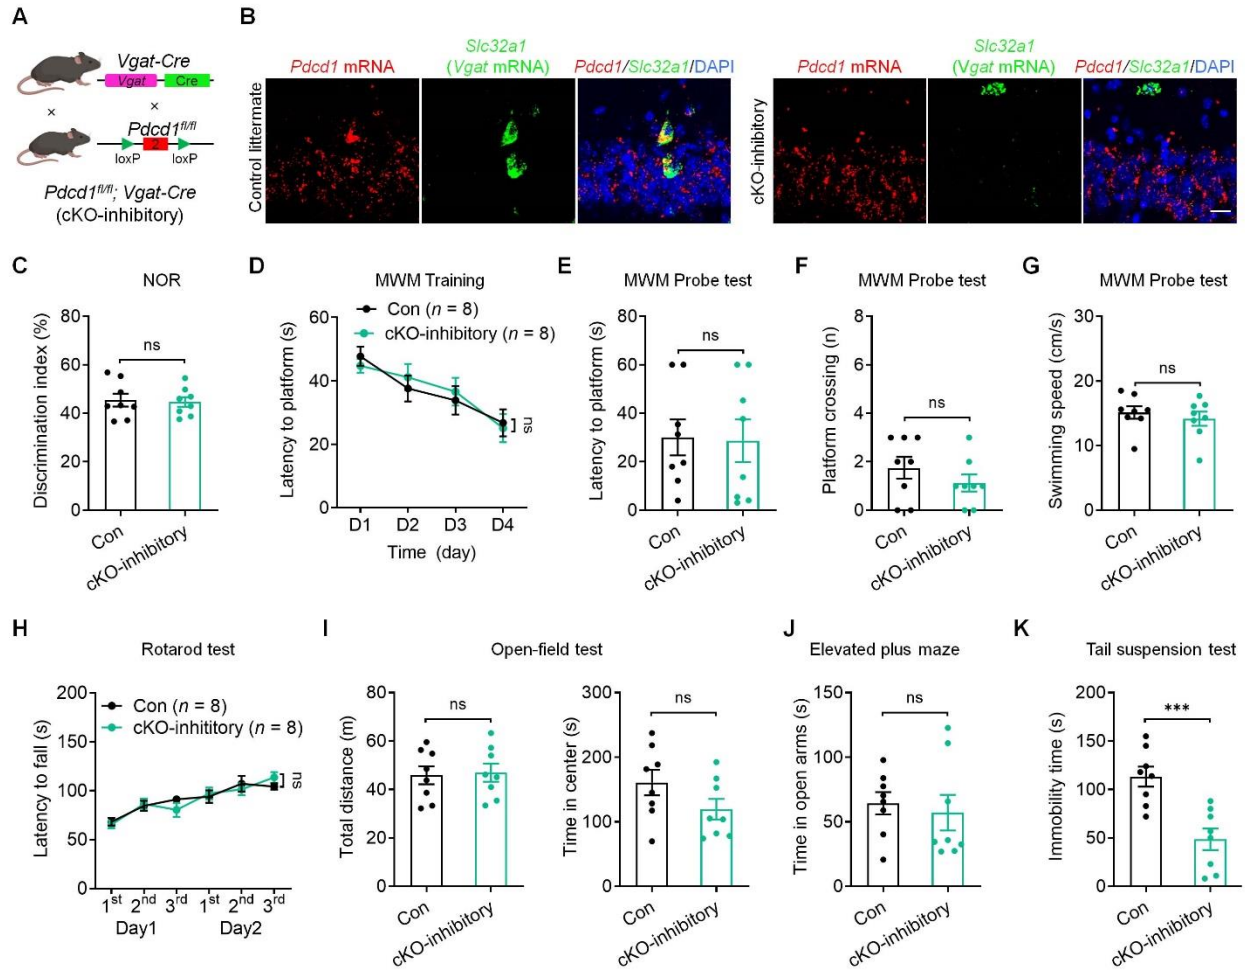

**Figure S7. Conditional knockout of *Pcdcl* in inhibitory interneurons does not affect learning and memory. Related to Figure 4.**

(A) Schematic illustration of the strategy to delete *Pcdcl* in inhibitory interneurons in conditional knockout mice (cKO-inhibitory).

(B) Representative images showing *Pcdcl* expression in CA1 inhibitory neurons of control littermates, which is substantially reduced in cKO-inhibitory mice. Scale bar, 20  $\mu$ m.

(C) Discrimination index of control littermates ( $n = 8$ ) and cKO-inhibitory mice ( $n = 8$ ) in NOR test.

(D) Spatial learning curves during MWM training showing learning capacity in control littermates ( $n = 8$ ) and cKO-inhibitory mice ( $n = 8$ ).

(E-G) MWM probe tests for latency to platform (E), platform zone crossings number (F), and swimming speed (G) in control littermates ( $n = 8$ ) and cKO-inhibitory mice ( $n = 8$ ).

**(H)** Motor coordination of control littermates ( $n = 8$ ) and cKO-inhibitory mice ( $n = 8$ ) in rotarod test.

**(I)** Locomotor activity (left) and anxiety-like behavior (right) in control littermates ( $n = 8$ ) and cKO-inhibitory mice ( $n = 8$ ) in open-field test.

**(J)** Anxiety-like behavior in control littermates ( $n = 8$ ) and cKO-inhibitory mice ( $n = 8$ ) measured in elevated-plus maze test.

**(K)** Depression-like behavior in control littermates ( $n = 8$ ) and cKO-inhibitory mice ( $n = 8$ ) measured in tail-suspension test.

Data are represented as mean  $\pm$  SEM. \*\*\* $P < 0.001$ ; ns, no significant. Two-tailed Student's t-test (C, G, I, J, K), Two-way ANOVA (D, H), Mann-Whitney test (E, F).

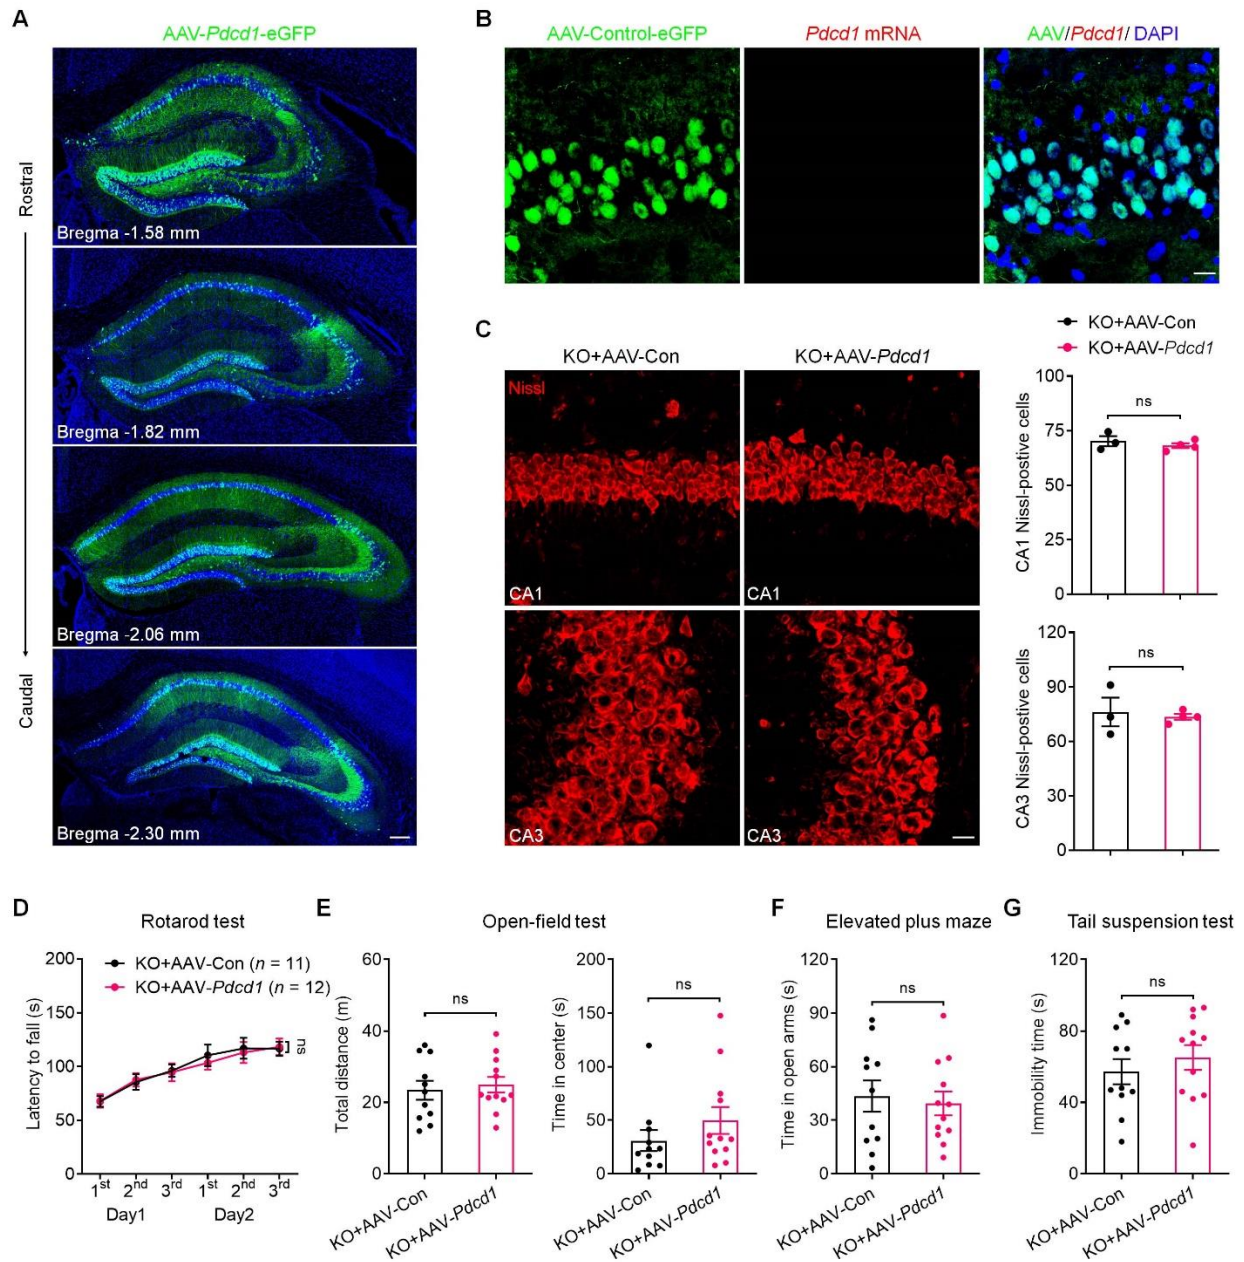

**Figure S8. Characterization of *Pdccl1* expression, neuronal loss, and learning/memory behaviors in PD-1 KO mice following the AAV-*Pdccl1* injections into the hippocampus. Related to Figure 5.**

(A) Representative confocal images of brain sections (rostral to caudal orientation) from mice injected with AAV-*Pdccl1* virus. Note extensive PD-1 expression (eGFP<sup>+</sup>) in the hippocampus. Blue: DAPI staining. Scale bar, 200  $\mu$ m.

(B) Representative confocal images showing no *Pdccl1* expression in PD-1 KO mice injected with AAV-control virus. Scale bar, 20  $\mu$ m.



(C) Representative confocal images (left) and quantification of CA1 and CA3 neurons (right) in PD-1 KO mice injected with AAV-control ( $n = 3$ ) and AAV-*Pdcd1* ( $n = 4$ ). Note that AAV-*Pdcd1* treatment does not change neuron number in CA1 and CA3. Scale bar, 20  $\mu\text{m}$

(D) Motor coordination of in PD-1 KO mice injected with AAV-control ( $n = 11$ ) and AAV-*Pdcd1* ( $n = 12$ ) in rotarod test.

(E) Locomotor function (left) and anxiety-like behavior (right) in PD-1 KO mice injected with AAV-control ( $n = 11$ ) and AAV-*Pdcd1* ( $n = 12$ ) in open-field test.

(F) Anxiety-like behavior of PD-1 KO mice injected with AAV-control ( $n = 11$ ) and AAV-*Pdcd1* ( $n = 12$ ) measured by elevated-plus maze test.

(G) Tail suspension test in PD-1 KO mice injected with AAV-control ( $n = 11$ ) and AAV-*Pdcd1* ( $n = 12$ ) to measure depressive level.

Data are represented as mean  $\pm$  SEM. ns: no significant. Two-tailed Student's t test (C, E, F, G, H), Two-way ANOVA (D).

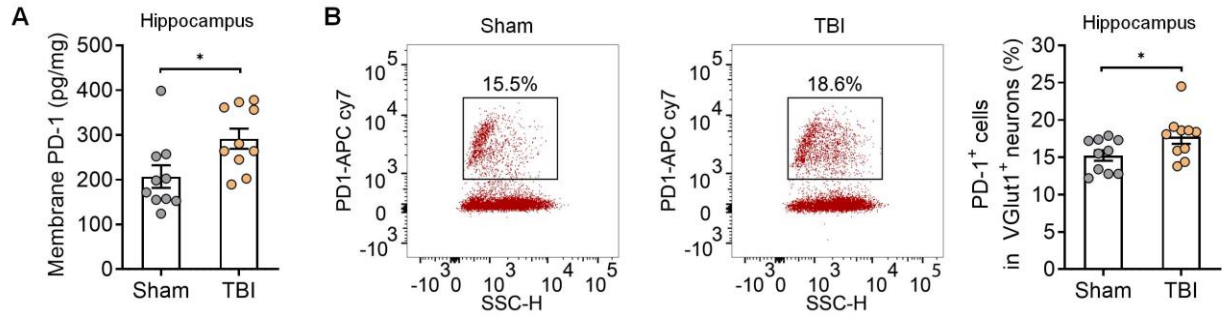

**Figure S9. Membrane PD-1 expression in hippocampi from sham and TBI mice. Related to Figure 6.**

(A) Cell-surface biotinylation and ELISA analysis showing membrane PD-1 levels in sham ( $n = 10$ ) and TBI ( $n = 10$ ) mice.

(B) Flow cytometry images (left) and quantification (right) showing the percentage of PD-1<sup>+</sup> cells in hippocampal Vglut1<sup>+</sup> excitatory neurons from sham ( $n = 10$ ) and TBI mice ( $n = 10$ ).

Data are represented as mean  $\pm$  SEM. \* $P < 0.05$ . Two-tailed Student's t test (A, B).

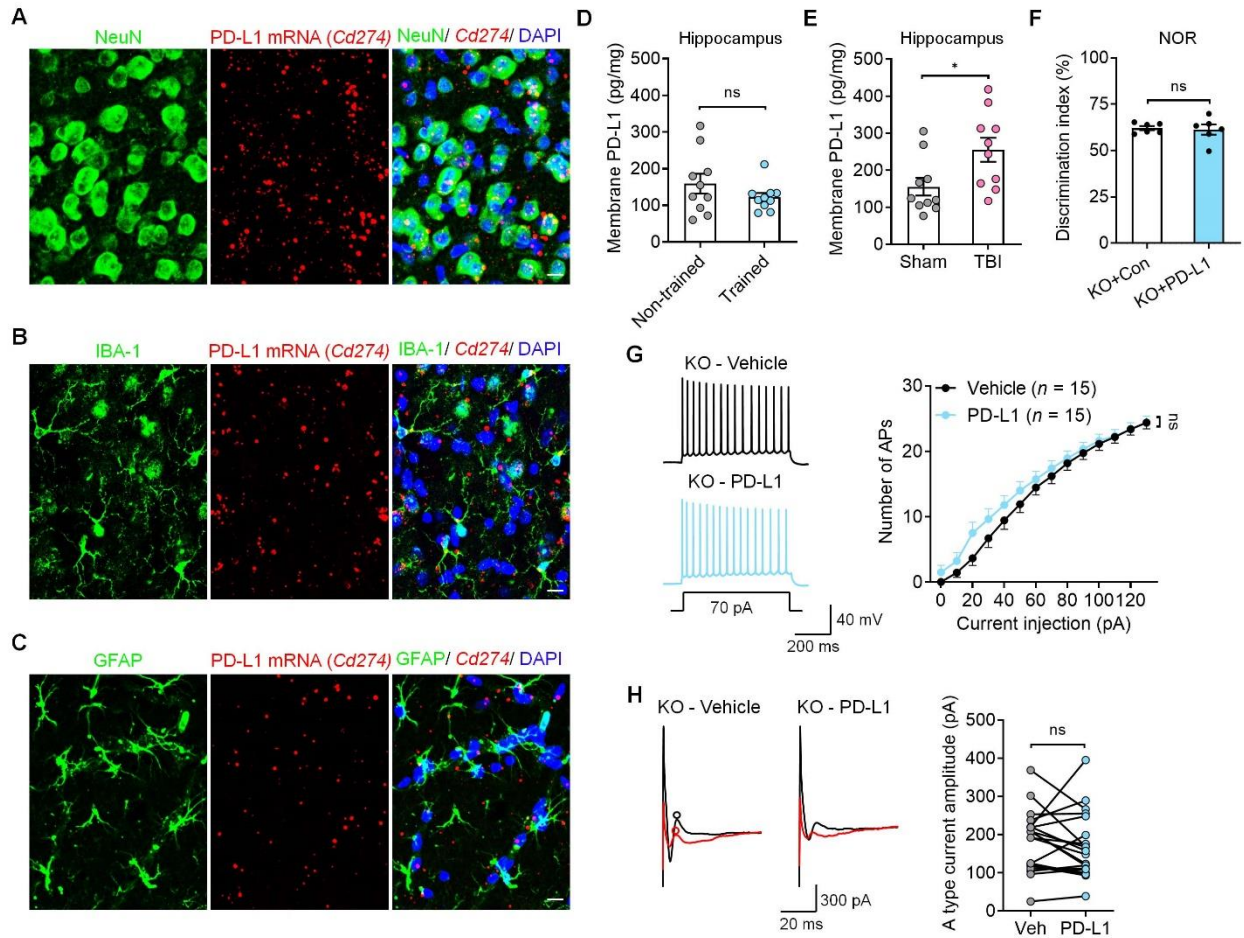

**Figure S10. Characterization of PD-L1 (*Cd274*) expression, membrane PD-L1 level, and the effect of PD-L1 in PD-1 KO mice. Related to Figure 7.**

(A-C) Representative confocal images showing double staining of *Cd274* mRNA (PD-L1, revealed by RNAscope) with NeuN (A), IBA-1 (B), GFAP (C). Scale bar, 20  $\mu$ m.

(D) Cell-surface biotinylation and ELISA analysis showing membrane PD-L1 levels in non-trained ( $n = 10$ ) and trained ( $n = 10$ ) mice.

(E) Cell-surface biotinylation and ELISA analysis showing membrane PD-L1 levels in sham ( $n = 10$ ) and TBI ( $n = 10$ ) mice.

(F) Discrimination index of PD-1 KO mice treated with ICV injection of control ( $n = 6$ ) or recombinant mouse PD-L1 ( $n = 6$ ) in NOR testing.

(G) Representative AP traces (left) and number of APs evoked by step current injection (0-130 pA, 10 pA) (right) in CA1 neurons from PD-1 KO neurons before or after perfusion of recombinant mouse PD-L1 (50 ng/mL,  $n = 15$  neurons from 4 mice).

**(H)** A type K<sup>+</sup> currents in CA1 neurons of brain slices of WT and PD-1 KO slices and the effects of PD-L1 (50 ng/mL). Left, representative outward current traces. Right, quantification of current amplitude before and after recombinant mouse PD-L1 perfusion ( $n = 21$  neurons from 4 mice). Black trace: nonconditioned current; red trace: conditioned current. A type current was isolated from the subtraction of red to black circles.

Data are represented as mean  $\pm$  SEM. \* $P < 0.05$ . ns, not significant. Two-tailed Student's t-test (D, E, F), Two-way ANOVA (G), Two-tailed paired Student's t-test (H).

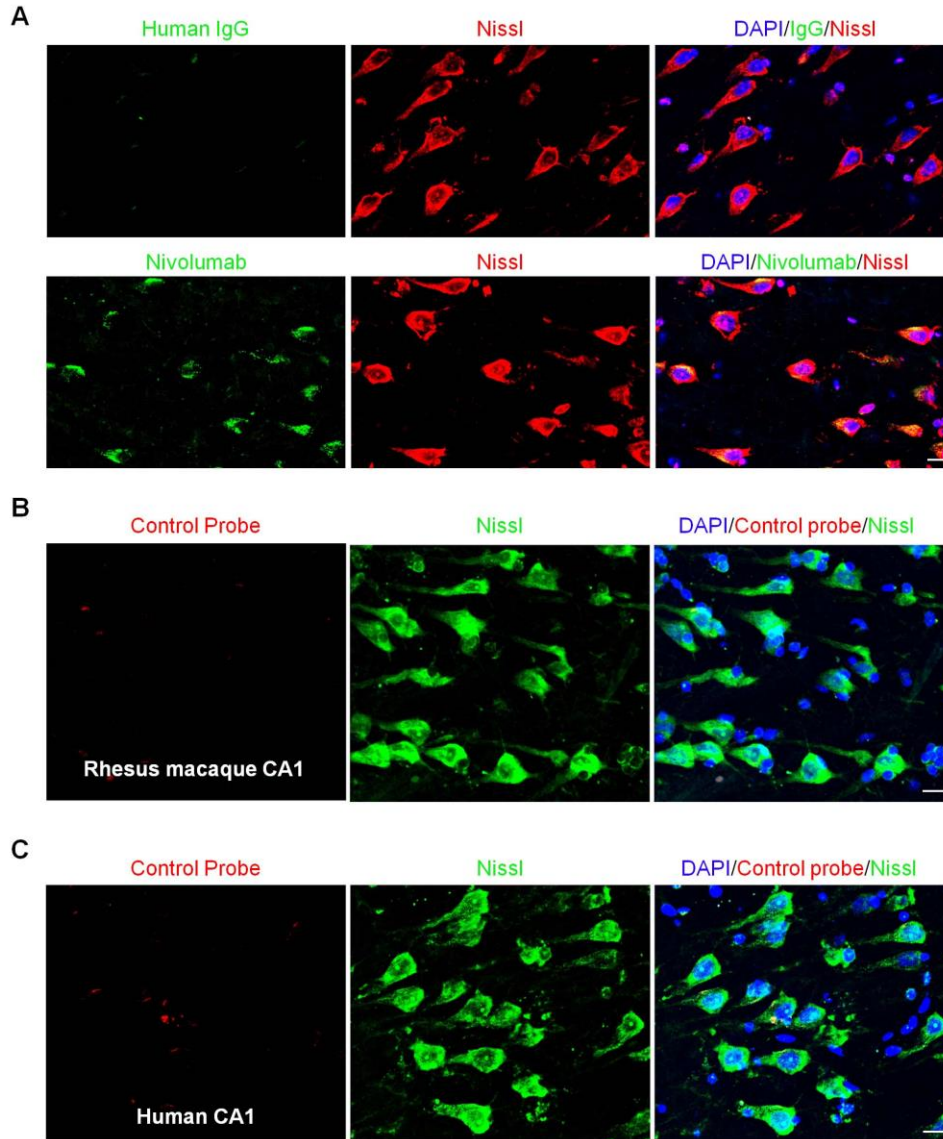

**Figure S11. Validation of *PDCDI* expression in NHP and human hippocampal neurons. Related to Figure 8.**

(A) Representative images showing nivolumab (anti-human PD-1 mAb) but not human IgG binding to human CA1 neurons. Scale bar, 20  $\mu\text{m}$ .

(B-C) Representative images of *in situ* hybridization show no staining of negative control probe in hippocampal neurons of NHP (B) and human (C) brain sections. Scale bar, 20  $\mu\text{m}$ .

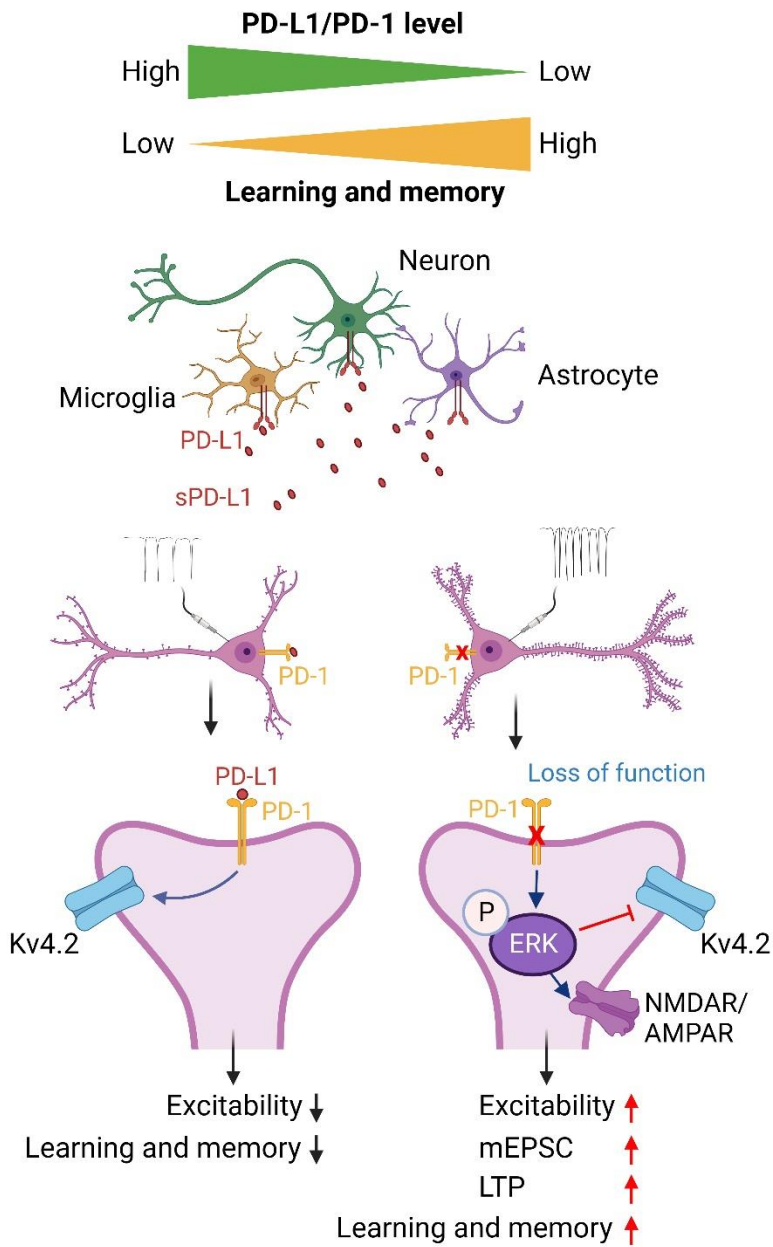

**Figure S12. Schematic of the working hypothesis for the regulation of neuronal excitability, synaptic transmission, and cognition by the PD-L1/PD-1 checkpoint pathway.**



**Table S1. Number of mice and samples used in this study. Related to Figures 1-8.**

(note: mice shared in different experiments are underlined.)

Provided as a separate Excel file.

**Table S2. Information for human donors/participants in this study, Related to Figures 7-8 and STAR Methods.**

| <b>Human</b> | <b>Sex</b> | <b>Ages</b>  | <b>Sample collection and experiments</b> |
|--------------|------------|--------------|------------------------------------------|
| H1           | Female     | 59 years old | Hippocampi collection for RNAscope       |
| H2           | Male       | 60 years old | Hippocampi collection for RNAscope       |
| H3           | Female     | 49 years old | Plasma/CSF collection for ELISA          |
| H4           | Female     | 22 years old | Plasma/CSF collection for ELISA          |
| H5           | Female     | 46 years old | Plasma/CSF collection for ELISA          |
| H6           | Female     | 69 years old | Plasma/CSF collection for ELISA          |
| H7           | Female     | 62 years old | Plasma/CSF collection for ELISA          |
| H8           | Female     | 37 years old | Plasma/CSF collection for ELISA          |
| H9           | Female     | 44 years old | Plasma/CSF collection for ELISA          |
| H10          | Male       | 64 years old | Plasma/CSF collection for ELISA          |

**Table S3. Information for NHPs used in different experiments in this study, Related to Figures 7-8 and STAR Methods.**

| <b>NHP</b> | <b>Sex</b> | <b>Ages</b>  | <b>Sample collection and experiments</b>                                                                               |
|------------|------------|--------------|------------------------------------------------------------------------------------------------------------------------|
| MK1        | Male       | 17 years old | CSF collection before and after capsaicin injection for ELISA                                                          |
| MK2        | Male       | 10 years old | CSF collection before and after capsaicin injection for ELISA                                                          |
| MK3        | Female     | 20 years old | CSF collection before and after capsaicin injection for ELISA                                                          |
| MK4        | Female     | 10 years old | Serum collection before capsaicin injection for ELISA<br>CSF collection before and after capsaicin injection for ELISA |
| MK5        | Female     | 10 years old | Serum collection before capsaicin injection for ELISA<br>CSF collection before and after capsaicin injection for ELISA |
| MK6        | Female     | 9 years old  | Serum collection before capsaicin injection for ELISA<br>CSF collection before and after capsaicin injection for ELISA |
| MK7        | Male       | 7 years old  | Serum collection before capsaicin injection for ELISA<br>CSF collection before and after capsaicin injection for ELISA |
| MK8        | Female     | 13 years old | Hippocampi collection for electrophysiology and RNAscope                                                               |
| MK9        | Male       | 19 years old | Hippocampi collection for electrophysiology and RNAscope                                                               |
| MK10       | Female     | 10 years old | Hippocampi collection for electrophysiology and RNAscope                                                               |
| MK11       | Male       | 9 years old  | Hippocampi collection for electrophysiology                                                                            |
| MK12       | Female     | 11 years old | Hippocampi collection for electrophysiology                                                                            |
| MK13       | Male       | 23 years old | Hippocampi collection for electrophysiology                                                                            |

**Table S4. Sequences of PCR primers for mouse genotyping experiments, Related to STAR Methods.**

| Mouse line                     | Source                 | Primer direction  | Sequences                 |
|--------------------------------|------------------------|-------------------|---------------------------|
| <i>Pdcd1</i> <sup>-/-</sup>    | The Jackson Laboratory | Common Forward    | CACTATCCCCTGACCCTTCA      |
|                                |                        | Wild type Reverse | AGAAGGTGAGGGACCTCCAG      |
|                                |                        | Mutant Reverse    | CACAGGGTAGGCATGTAGCA      |
| <i>Pdcd1</i> <sup>fl/fl</sup>  | This paper             | Forward           | CCCTCTCCAAGTCTGAGGTTT     |
|                                |                        | Reverse           | CCTTCCCCTCCTGTTCAAG       |
| <i>Camk2a-Cre</i>              | The Jackson Laboratory | Forward           | TTACCGGTCGATGCAACGAGT     |
|                                |                        | Reverse           | TTCCATGAGTGAACGAACCTGG    |
| <i>Cx3cr1</i> <sup>CreER</sup> | The Jackson Laboratory | Common Forward    | ACGCCCAGACTAATGGTGAC      |
|                                |                        | Wild type Reverse | AGCTCACGACTGCCTTCTTC      |
|                                |                        | Mutant Reverse    | GTTAATGACCTGCAGCCAAG      |
| <i>Vgat-Cre</i>                | The Jackson Laboratory | Common Forward    | CTTCGTCATCGGCGGCATCTG     |
|                                |                        | Wild type Reverse | CAGGGCGATGTGGAATAGAAA     |
|                                |                        | Mutant Reverse    | CCAAAAGACGGCAATATGGT      |
| Ai9                            | The Jackson Laboratory | Wild type Forward | AAGGGAGCTGCAGTGGAGTA      |
|                                |                        | Wild type Reverse | CCGAAAATCTGTGGGAAGTC      |
|                                |                        | Mutant Forward    | CTGTTCTGTACGGCATGG        |
|                                |                        | Mutant Reverse    | GGCATTAAAGCAGCGTATCC      |
| <i>Pdcd1-Cre</i>               | This paper             | Forward           | CCAGGCCCCCAGAGCCATATC     |
|                                |                        | Reverse           | CCATAGGCTCCCCATTGACTTCTTG |

**Table S5. Statistical table. Related to Figures 1-8.**

Provided as a separate Excel file.
